# Supplementary material for: Ex vivo miRNome analysis in Ptch1+/− cerebellum granule cells reveals a subset of miRNAs involved in radiation-induced medulloblastoma
Source: PubMed Central journal article supplement (PMC5356552; doi:10.18632/oncotarget.11938), 2016-09-10
Supplement: oncotarget-07-68253-s001.pdf [file oncotarget-07-68253-s001.pdf]

# Ex vivo miRNome analysis in *Ptch1*<sup>+/-</sup> cerebellum granule cells reveals a subset of miRNAs involved in radiation-induced medulloblastoma

## Supplementary Materials

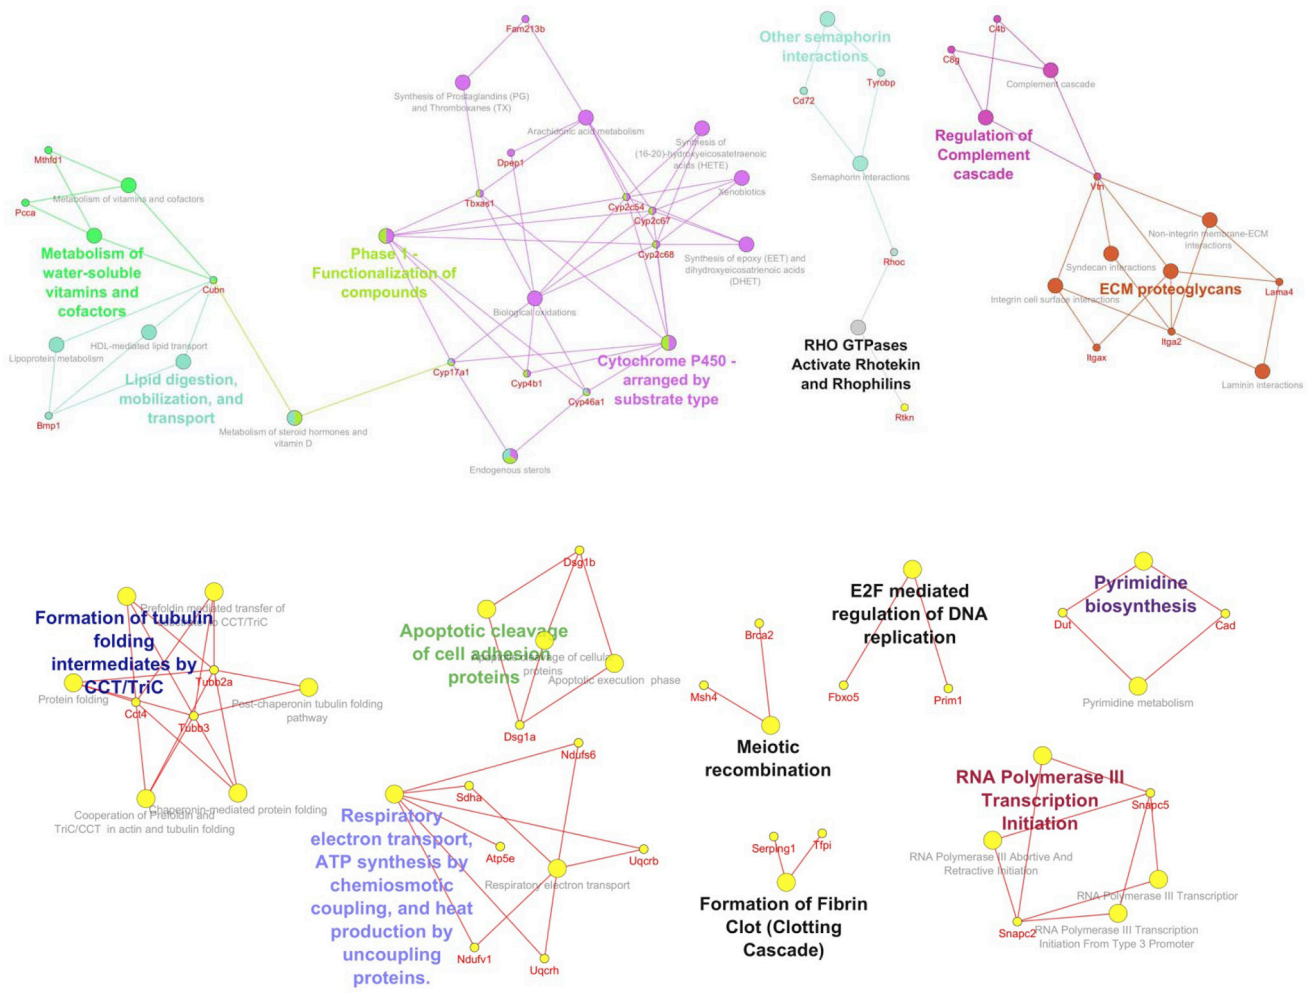

Supplementary Figure S1: Pathway enrichment analysis was performed on the statistically significant miRNAs altered in unirradiated *Ptch1*<sup>+/-</sup> GCPs versus WT GCPs. Focus on the other Reactome-based pathways and mRNAs, not shown in Figure 2A, predicted to be altered by the differentially expressed miRNAs.
